# Supplementary material for: Primary Care Provider Perspectives on Expanded Genomic Screening in Children
Source: Research Square preprint supplement (doi:10.21203/rs.3.rs-7012425/v1), 2025-09-09
Supplement: Supplementary file 1 [file 53dd48faeddd6b08e8796832.docx]

ABGS -- ORIGINAL

Start of Block: block1

The purpose of this research study is to assess interest in and organizational readiness of providers and staff in pediatric and family medicine clinics across the state of North Carolina to engage with and implement Age-Based Genomic Screening (ABGS), an innovative paradigm that aims to provide targeted and highly actionable genetic information to parents via their child's routine wellness visits.  You are being asked to take part in a research study because you are a pediatric and/or family medicine clinic director, provider and/or staff practicing in the state of North Carolina AND you indicated that you were interested in participating in this survey. Being in a research study is completely voluntary. You can choose not to be in this research study. You can also say yes now and change your mind later. If you agree to take part in this research, you will be asked to fill out a short electronic survey regarding information about your practice’s characteristics and your opinions on ABGS. Your participation in this study will take about 10 minutes. You can choose not to answer any question you do not wish to answer. You can also choose to stop taking the survey at any time. You must be at least 18 years old to participate. If you are younger than 18 years old, please stop now. There are no apparent risks to you in taking part in this research. To protect your identity as a research subject, any identifiable information will be collected anonymously and will be stored separately from the survey data. If you have any questions about this research, please contact the investigator by calling 919-966-7043 or emailing jonathan_berg@med.unc.edu. If you have questions or concerns about your rights as a research subject, you may contact the UNC Institutional Review Board at 919-966-3113 or by email to IRB_subjects@unc.edu.

| Page Break |  |
| --- | --- |

We’d first like to learn a little bit about your practice.

What is the name of your practice?

________________________________________________________________

________________________________________________________________

________________________________________________________________

________________________________________________________________

________________________________________________________________

| 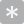 |
| --- |

In which NC county is your practice located?

________________________________________________________________

________________________________________________________________

________________________________________________________________

________________________________________________________________

________________________________________________________________

What is your role in the practice?

- Practice manager
- Clinical care coordinator
- Physician
- Nurse practitioner
- Certified nurse midwife
- Physician assistant
- Other (please specify) __________________________________________________

| Page Break |  |
| --- | --- |

Display this question:

If What is your role in the practice? = Practice manager

Or What is your role in the practice? = Clinical care coordinator

| 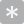 |
| --- |

How many front-line providers are in your practice (physicians, nurse practitioners, certified nurse midwives, physician assistants)?

________________________________________________________________

Display this question:

If What is your role in the practice? = Practice manager

Or What is your role in the practice? = Clinical care coordinator

| 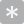 |
| --- |

About how many patients visits were in your practice in 2022?

________________________________________________________________

Display this question:

If What is your role in the practice? = Practice manager

Or What is your role in the practice? = Clinical care coordinator

How would you best categorize your practice?

- Academic affiliated
- Private
- Federally qualified health center
- Other

Display this question:

If What is your role in the practice? = Practice manager

Or What is your role in the practice? = Clinical care coordinator

| 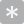 |
| --- |

About what percent of your practice's patients are insured by Medicaid or CHIP?

________________________________________________________________

Display this question:

If What is your role in the practice? = Practice manager

Or What is your role in the practice? = Clinical care coordinator

| 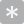 |
| --- |

About what percent of your practice's patients have private insurance?

________________________________________________________________

Display this question:

If What is your role in the practice? = Practice manager

Or What is your role in the practice? = Clinical care coordinator

| 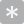 |
| --- |

About what percent of your practice's patients are pediatric (younger than 18)?

________________________________________________________________

| Page Break |  |
| --- | --- |

Display this question:

If What is your role in the practice? = Physician

Or What is your role in the practice? = Nurse practitioner

Or What is your role in the practice? = Certified nurse midwife

Or What is your role in the practice? = Physician assistant

How many years have you been practicing primary care?

- 0-5 years
- 6-10 years
- 11-15 years
- More than 15 years

Display this question:

If What is your role in the practice? = Physician

Or What is your role in the practice? = Nurse practitioner

Or What is your role in the practice? = Certified nurse midwife

Or What is your role in the practice? = Physician assistant

| 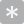 |
| --- |

About how many pediatric patients (younger than 18) do you see per week?

________________________________________________________________

Display this question:

If What is your role in the practice? = Physician

Or What is your role in the practice? = Nurse practitioner

Or What is your role in the practice? = Certified nurse midwife

Or What is your role in the practice? = Physician assistant

How many times have you needed to follow up on (e.g., order a test, consult an expert) an abnormal result from the newborn metabolic screen for a newborn patient?

- Never in my practice
- 1-2 times
- 3-5 times
- 6 or more times

End of Block: block1

Start of Block: block2

Next, we’re interested in learning about your general perceptions of genetic screening.   We define genetic screening as using focused genetic testing to detect certain diseases at an early stage, before symptoms are noticeable and when early intervention can impact health outcomes.

| 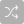 |
| --- |

For each of the following statements, please indicate your level of agreement by choosing one of the response options.

|  | Strongly Disagree | Somewhat Disagree | Somewhat Agree | Strongly Agree |
| --- | --- | --- | --- | --- |
| The information generated by genetic screening is important for patient care. |  |  |  |  |
| I believe that genetic screening is relevant to my current clinical practice. |  |  |  |  |
| Genetic screening will improve my ability to care for patients. |  |  |  |  |
| I am comfortable talking about genetic screening with my patients and their families. |  |  |  |  |
| I am confident in my ability to use the results of genetic screening with my patients. |  |  |  |  |

End of Block: block2

Start of Block: block3

The next set of items focuses on the Age-Based Genomic Screening (ABGS) program. As a reminder, ABGS is a genomic screening program under development. It will incorporate targeted genomic sequencing for a select number of highly actionable genetic conditions throughout childhood. The goal is to make opt-in screening for specific genetic disorders available to all children at clinically relevant times. Our team is currently working with pediatric primary care providers, experts in genetics and child development, and community members to determine WHAT diseases to screen for, WHEN (which WCC visits), and HOW (blood vs saliva). We anticipate ABGS will screen for about 20 diseases from infancy through adolescence. Possible conditions include Familial Adenomatous Polyposis, Marfan Syndrome, and Familial Hypercholesterolemia. In two years, our team will work with primary care practices to pilot ABGS into routine well visits during childhood. Right now, we need your input on how best to do this. Your participation in this survey helps us develop the ABGS program.

| 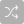 |
| --- |

The following is a list of potential benefits of implementing ABGS in your primary care practice. Please indicate the degree of importance of each potential benefit: high importance, medium importance, low importance, or not important.

|  | High importance | Medium importance | Low importance | Not important |
| --- | --- | --- | --- | --- |
| Opportunity to identify rare diseases prior to symptom onset that can lead to prompt clinical intervention. |  |  |  |  |
| Potential to eliminate diagnostic evaluations for some patients with rare genetic diseases. |  |  |  |  |
| Placing my practice at the forefront of innovations in pediatric medicine. |  |  |  |  |
| Providing my patients access to medical experts for follow up when screening identifies a rare genetic condition. |  |  |  |  |
| Increasing access to advanced screening for my patients. |  |  |  |  |
| Potential to reduce disparities in recognition of genetic conditions by screening all patients. |  |  |  |  |
| Improving outcomes for pediatric patients on a population level. |  |  |  |  |
| Help my patients and their families learn more about how genetics affects health. |  |  |  |  |
| Help me be more involved in the care of my patients with genetic diseases. |  |  |  |  |

If you think we left out a potential benefit, please share it here:

________________________________________________________________

________________________________________________________________

________________________________________________________________

________________________________________________________________

________________________________________________________________

End of Block: block3

Start of Block: block4

| 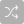 |
| --- |

The following is a list of potential barriers to implementing ABGS in your primary care practice. Please indicate how concerned you are that each of the following would be a barrier: extremely concerned, moderately concerned, slightly concerned, not at all concerned.

|  | Extremely concerned | Moderately concerned | Slightly concerned | Not at all concerned |
| --- | --- | --- | --- | --- |
| It would take too much provider time during well visits. |  |  |  |  |
| It will be difficult to incorporate into our existing clinic workflow. |  |  |  |  |
| It could lead to increased anxiety for our patients and their families. |  |  |  |  |
| It could lead to significant financial cost for our patients and their families. |  |  |  |  |
| Access to timely consultation with genetic specialists is inadequate. |  |  |  |  |
| Our clinic providers would have limited confidence discussing it. |  |  |  |  |
| Our patients would not be interested in it. |  |  |  |  |
| Our patients do not need it. |  |  |  |  |
| The evidence is not strong enough to support it. |  |  |  |  |

If you think we left out a potential barrier, please share it here:

________________________________________________________________

________________________________________________________________

________________________________________________________________

________________________________________________________________

________________________________________________________________

| Page Break |  |
| --- | --- |

End of Block: block4

Start of Block: block5

| 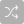 |
| --- |

The following is a list of ways to potentially help implement ABGS in primary care. For each item, please indicate how helpful you think it would be: very helpful, somewhat helpful, not very helpful, not at all helpful.

|  | Very helpful | Somewhat helpful | Not very helpful | Not at all helpful |
| --- | --- | --- | --- | --- |
| Low literacy and bilingual information materials about ABGS for patients (e.g., dot phrase for After Visit Summary about purpose of screening, possible outcomes, and next steps). |  |  |  |  |
| A direct point of contact to the research team for potentially interested families to reach out to about ABGS. |  |  |  |  |
| Providing hands-on implementation support during the pilot. |  |  |  |  |
| Succinct information materials about ABGS for providers. |  |  |  |  |
| Educational In-service about genetic conditions and genetic testing/screening for your practice. |  |  |  |  |
| Completion of a brief assessment to determine what needs to be addressed to incorporate ABGS in your clinic. |  |  |  |  |
| A guide for coding and billing, including counseling time and dot phrases for documentation. |  |  |  |  |
| A written plan outlining the roles, responsibilities, and processes for ABGS developed by our team and adapted with your input to fit your practice needs. |  |  |  |  |
| Identification and support of provider champions for ABGS in your practice. |  |  |  |  |

If you think we left out something that would help make implementing ABGS in primary care easier, please share it here:

________________________________________________________________

________________________________________________________________

________________________________________________________________

________________________________________________________________

________________________________________________________________

| Page Break |  |
| --- | --- |

Please rank the following aspects of the ABGS program from 1 to 4 where 1 is the most likely to influence the feasibility of implementing it in your clinic and 4 is the least likely.

______ How specimen is collected from patients (blood vs. saliva)

______ Number of different time points at which genomic screening would be offered during childhood.

______ Ability to receive reimbursement for time spent counseling families about genetic screening.

______ Comprehensiveness of supporting materials and resources (EHR smartphrases, information sheets, access to research team members for questions)

If you think something else would influence the feasibility of implementing ABGS in your clinic, please share it here:

________________________________________________________________

________________________________________________________________

________________________________________________________________

________________________________________________________________

________________________________________________________________

End of Block: block5

Start of Block: block6

Here are some ways pediatric primary care providers are helping with the ABGS project. Which are most interesting to you? We recognize that your time is valuable; all forms of involvement will be incentivized

|  | Yes/Interested | No/Not interested | Not sure |
| --- | --- | --- | --- |
| Participate in a 1-hour interview with a member of our team about the feasibility of incorporating ABGS in your practice. |  |  |  |
| Host a clinic in-service seminar from our team to learn more about genetic screening in children, and about participating in ABGS. |  |  |  |
| Provide feedback to our team on resources and strategies needed to pilot test ABGS effectively in primary care practices. (Further details available if interested) |  |  |  |
| Participate in the pilot offering of ABGS to a small number of your patients (Further details available if interested) |  |  |  |
| Some other way |  |  |  |

| Page Break |  |
| --- | --- |

End of Block: block6

Start of Block: block7

This project is funded by the National Institutes of Health (NIH). We are collecting the following information about participants for NIH reporting purposes.

How would you describe your current gender identity? Select all that apply.

- Man
- Woman
- Non-binary
- Transgender
- My preferred term is (please specify) __________________________________________________

What descriptors do you use to describe the population group you belong to? Select all that apply.

- American Indian or Alaskan Native
- Asian
- Black or African American
- Hispanic/Latino
- Native Hawaiian or Other Pacific Islander
- White
- Unknown
- Prefer not to answer
- Please provide any additional detail in place of (or in addition to) the options above (please specify) __________________________________________________

| Page Break |  |
| --- | --- |

End of Block: block7

Start of Block: block9

Please share any questions or comments you have for our team:

________________________________________________________________

________________________________________________________________

________________________________________________________________

________________________________________________________________

________________________________________________________________

End of Block: block9

Start of Block: Block 8

Selecting yes to either of the following questions will take you to another page where you can provide your email address. Your contact information will not be linked to your responses.

Are you interested in receiving a gift card for completing the survey?

- Yes
- No

Are you interested in participating in the ABGS project?

- Yes
- No

End of Block: Block 8
